# Supplementary material for: Probable Role of Type IV Pili of Aeromonas hydrophila in Human Pathogenicity
Source: MDPI journal article supplement (doi:10.3390/pathogens13050365), 2024-04-28
Supplement: s1 [file s1]

# Probable Role of Type IV Pili of *Aeromonas hydrophila* in Human Pathogenicity

Agradip Bhattacharyya <sup>1</sup>, Goutam Banerjee <sup>2,\*</sup> and Pritam Chattopadhyay <sup>3,\*</sup>

<sup>1</sup> Raja Rammohun Roy Mahavidyalaya, Radhanagar, Nangulpara, Hooghly, West Bengal 712406, India; agradipbhattacharyya@gmail.com

<sup>2</sup> Department of Food Science and Human Nutrition, University of Illinois at Urbana-Champaign, Urbana, IL 61801, USA

<sup>3</sup> M.U.C. Women's College, Burdwan, Purba-Bardhaman, West Bengal 713104, India

\* Correspondence: goutamb@illinois.edu (G.B.); pritam.biotechnol@gmail.com (P.C.)

**Table S1:** Reference data set for components of T4P secretion system from previous publications used as primary quarry

| Sl. No. | Gene | Reference |
|---------|------|-----------|
| 1       | fimT | [1]       |
| 2       | mshE | [2]       |
| 3       | pilA | [3]       |
| 4       | pilB | [4]       |
| 5       | pilC | [5]       |
| 6       | pilD | [6]       |
| 7       | PilE | [7]       |
| 8       | pilF | [8]       |
| 9       | pilM | [9]       |
| 10      | pilN | [10]      |
| 11      | pilO | [11]      |
| 12      | pilP | [12]      |
| 13      | pilQ | [13]      |
| 14      | pilT | [14]      |
| 15      | pilV | [15]      |
| 16      | pilW | [16]      |
| 17      | pilX | [17]      |
| 18      | pilY | [18]      |
| 19      | pilZ | [19]      |

**Table S2:** Reference data set used for identification of orthologs for components of T4P secretion system

| Sl. No. | Gene | Locus tag in <i>Aeromonas hydrophila</i> subsp. <i>hydrophila</i> ATCC 7966 | Ortholog Identification No (KO No.) |
|---------|------|-----------------------------------------------------------------------------|-------------------------------------|
| 1       | fimT | AHA_0686                                                                    | K08084                              |
| 2       | fimT | AHA_0693                                                                    | K08084                              |
| 3       | mshE | AHA_0392                                                                    | K12276                              |
| 4       | pilA | AHA_3868                                                                    | K02650                              |
| 5       | pilB | AHA_3869                                                                    | K02652                              |
| 6       | pilC | AHA_3870                                                                    | K02653                              |
| 7       | pilD | AHA_3871                                                                    | K02654                              |
| 8       | PilE | AHA_0692                                                                    | K02655                              |
| 9       | PilE | AHA_0691                                                                    | K02655                              |
| 10      | pilF | AHA_1757                                                                    | K02656                              |
| 11      | pilM | AHA_3194                                                                    | K02662                              |
| 12      | pilN | AHA_3193                                                                    | K02663                              |
| 13      | pilO | AHA_3192                                                                    | K02664                              |
| 14      | pilP | AHA_3191                                                                    | K02665                              |
| 15      | pilQ | AHA_3190                                                                    | K02666                              |
| 16      | pilT | AHA_2739                                                                    | K02670                              |
| 17      | pilV | AHA_0687                                                                    | K02671                              |
| 18      | pilW | AHA_0688                                                                    | K02672                              |
| 19      | pilX | AHA_0689                                                                    | K02673                              |
| 20      | pilY | AHA_0690                                                                    | K02674                              |
| 21      | pilZ | AHA_0877                                                                    | NA                                  |
| 22      | pilZ | AHA_3680                                                                    | NA                                  |

**Table S3:** Reference data set for protein components of T4P secretion system used as secondary quarry

| Sl. No. | Protein | Ortholog Identification No (KO No.) | Uniprot ID | Amino acid sequence                                                                                                                                                                                                                                                                                                                                                                                                                                                                                                                                                                                                           |
|---------|---------|-------------------------------------|------------|-------------------------------------------------------------------------------------------------------------------------------------------------------------------------------------------------------------------------------------------------------------------------------------------------------------------------------------------------------------------------------------------------------------------------------------------------------------------------------------------------------------------------------------------------------------------------------------------------------------------------------|
| 1       | fimT    | K08084                              | A0KG43     | MFLRSGFSLIELMVTVALISILLTGVPSFSAILRNMTLTSQANNFVAAINLARSEAIR<br>RNTAVTLSATASNLTQNHWESGWQIWVDRNGNGTLDNGELLRLFPDMGAGTLV<br>SNTSLVRFSGNGFLDGRQQVALVFSLQPPECAQEASRDITITPAGRPSIVETSCI                                                                                                                                                                                                                                                                                                                                                                                                                                                |
| 2       | fimT    | K08084                              | A0KG50     | MEGRKGRSAGFTLIELMVALLSLVALLTVAIPSYQSLRQDQMVKAATQAVYTD<br>MLLKSEALKRNRNLQMILFNSGTGNWCYRISIDGSCASCNDTCSSIEGRKGVDA<br>SEFPGIILTGTYTESSQIRPISFSPRRGTLPGSITVSSAASMKVVTNNLGRVRTCAV<br>SNLVGEVACN                                                                                                                                                                                                                                                                                                                                                                                                                                    |
| 3       | mshE    | K12276                              | A0KF99     | MAQPRLKMRLGDLVQEQIISDDQLQLALQQQRQTGRKLGTTLIDLGFISEVQLLQ<br>FLARQLDVPFFDLNNLTIDASAVPLLPEVQARRYRALAVNLTDNKVTVAMSDPA<br>DLSALDAIAALLRPREMGLAVAREGQLLEYFDRLYRRTREIESFAEQLHEEYQDAG<br>FELGSSNLGAGDEGEATVAKLLRSLFEDAVQVGASDIHIEPDEKVLIRQRIDGILH<br>ENILSEVRIAQALVLRKLVAAGLDISEKRLPQDGRFNMKVRGRDQVDMSTMPVQ<br>YGESVVMRLLDQSSGILSLTETGMPPEILTRFRRLKRPHEGMLVTGPTGSGKTTTL<br>YGALSELNQASQKIITVEDPVEYRLPRVNQVQVNPQIGLTFSHVLRSTLRQDPDILL<br>VGEMRDNETVEIGLRGAITGHLVLTTLHTNDVTSALRLIDMGAPGYLVASALRA<br>VVAQRLVRRVCEHCVEEKAPDEGQATWLTVLSGEAPGQHVYHKGRGCQSCNFT<br>GYAGRIGVYELLELDQPMMDSLRRNDAEGFAKAARQHPHYRPLALTALDYARQ<br>GITSVDEVLRRLAEDLG |
| 4       | pilA    | K02650                              | A0KPV6     | MKKQSGFTLIELMIVVAIVAILAAIALPAYQTYTLRAKYSEVIAAAGPAKTAVEVCV<br>QSLDVTALDNLNATAGGSCIDAANSALASAIAANANAARIDTDNTKTAAATGAN<br>TVTITVTSGTDFANLTPANPTFVMVGTVEASKQVNWTRDTGTCAAASMC                                                                                                                                                                                                                                                                                                                                                                                                                                                      |
| 5       | pilB    | K02652                              | A0KPV7     | MLTMTSSPNSGLALSAAASSLLSESDSQRYLSQAKAQRKPFVTFLENEILDSKALA<br>DFCELEYGVPLDLAAFDLAEIPQKYLNQKLIKHHVLPITYTQGHTLYIAMSDPTN<br>VSALEDFGFSFGLHTEALLVEENKLTTAISKLMEQDQDALGMEDIDSEISELEVSDE<br>GSRLDESVENTADDDAPIVKYINKIMMDAIKRGASDLHFEPYETKYRIRFRIDGILHEI<br>ATPPVNLANRFSARLKVMARLDIAERRLPQDGRIKLKLSRNKSMDMRVNTLPTM<br>WGEKIVIRLLDSSAARLNIEQLGFDERQKAQYLRALSKPQGMILVTGPTGSGKTVSL<br>YTGLNILNTTEVNISTAEDPVEINLPGVNQVQVNPQAGLTFASALRSFLRQDPDVV                                                                                                                                                                                            |

|    |      |        |        |                                                                                                                                                                                                                                                                                                                                                                                                                                                      |
|----|------|--------|--------|------------------------------------------------------------------------------------------------------------------------------------------------------------------------------------------------------------------------------------------------------------------------------------------------------------------------------------------------------------------------------------------------------------------------------------------------------|
|    |      |        |        | MVGEIRDLETAIEIAKAAQTGHLVLSTLHTNSAAETLTRMMNMGVPAFNIASSVT<br>LIMAQRLARKLCDHCKAPEVVPEAEELLELGFTQQQLAAGLRLFKPVGCKECSGGY<br>KGRVGIYEIMLMSENIAKLIMQGANSLQIAAIAQKEGMRTLRTSGLEKARLGVTSL<br>AEINRVTTN                                                                                                                                                                                                                                                         |
| 6  | pilC | K02653 | A0KPV8 | MATLTQKQNAPKKVFAFRWSGVNRKGQKVSSELQADSINTVKAELRKQGVNVT<br>KVSCKSQGLFSKGGAKIKPMDIAVVSQRITTMLSAGVPLVQSLQIARSHEKAAMR<br>ELMGQIAADVETGTPMSEALRRHPRHFDDLYCDLVEAGEQSGALETIYDRIATYRE<br>KSEALKSKIKKAMFYPTMVILVAIVVTSILLFVIPQFEDIFKSFGAELPIFTQFVIGISR<br>FMQNWVYVIFGGIALAIFLYVRAWRASQKVKDNTDKFILTPVVGMLHKAAMA<br>RFARTLSTTFSAGIPLVDALVSAAGASGNYVYRTAVMAIRNEVVAGMQINVAMRT<br>VDLFPDMVIQVMVIGEESGAIDDMLSKVATIFEQEVDLVDGLTSLLEPLIMVVLG<br>VLVGGMVVMYLPFIFKLGSVIH |
| 7  | pilD | K02654 | A0KPV9 | MLLITDVFHSLPWLYFSLVFLFSLMIGSFLNVVIHRLPIMLEREWQAEYLGYNPETL<br>PQQEERYNLMVPRSACPHCGHAITAMENIPLLSWLWLKGRCRECQAPISVRYPLV<br>ELLTALLSLVVAATFAPGWGLLAALLLTWVLVALTFIDLDKMLLPDQLTLPLLWG<br>GLLFNLAGGFIPLADAVIGAMAGYLVLSLYWAFKLLTGKEGMGYGDFKLLAAL<br>GAWLGWQALPIVLLSSLVGAFIGLILLRNHHQNKPIPGPYLAAGWIALWLG<br>DTITRWYLTTF                                                                                                                                       |
| 8  | Pile | K02655 | A0KG49 | MRIKQSGITLLELIVVTVIAIASVAYPSFTDGLRKSRRAEALKGLLSMQLKQEEFR<br>VSNTSYSATPSQVGNTSSYYDFSIGATATNYTLIATSKGAQVGDKSGSTICNTLTL<br>NKADTKTPAACW                                                                                                                                                                                                                                                                                                                 |
| 9  | Pile | K02655 | A0KG48 | MVRGFSLMELMIAVAVTAILTVIAYPSYNSYMASAKRAEAKAALLEAAQYMERQF<br>TADGNYDGGNLAAGLATLPRDGGTAYYNLALNASGASYTLTAIPTGVMNGDP<br>CGLLTLDQGGQQGVSMASMTAAECW                                                                                                                                                                                                                                                                                                         |
| 10 | pilF | K02656 | A0KJ42 | MYSQGM DTRTLIVVAALCALPGCVTETTYAGQNSTQREVGPDLKAAAQTRLDLG<br>IQYLQQGNAEQAKFNLDRALQYDPANPQVYVGFAYFYQQVEDFKAAEESYKKAL<br>AMDPSNADAMNNYGAFLCNRGRFDEAEKAFLQAVSQPNYIKIADTYENAALCA<br>AQNRNRNDKASEYYRLALGYNPRNPRLLDMAELSMKDGKLPDVQAYLARFADV<br>SDENENSLWLRLLAQAMDKPALLHQFGTELVRQYPTSQQA KRYLANDY                                                                                                                                                             |
| 11 | pilM | K02662 | A0KN34 | MDVYMFGLFNKGSLLPLAGIDFGSQTIKAVTITGRPGKLHLESVAEVATPKGTLVD<br>YQLQDIERSQSLKALKRLISGSSQYVATAVTGSNVITKVIQVDAALGENELENQV<br>QLEAEQLIPFPLDEVSLDFEILGKVNDQERREVLLSAARTESVSGRVTALAEADMTT<br>KVVDVGAHALGRAVLACLPELQEWDPVGVIGASAMTFAALVKGEVIYSRLQ<br>NFGGDQYSQALASFYNLSLDDAEQAKLQGKLPVDHELDVLLPHMNALLQQVRR                                                                                                                                                     |

|    |     |        |        |                                                                                                                                                                                                                                                                                                                                                                                                                                                                                                                                                                                                                                                                                                                                                                                                             |
|----|-----|--------|--------|-------------------------------------------------------------------------------------------------------------------------------------------------------------------------------------------------------------------------------------------------------------------------------------------------------------------------------------------------------------------------------------------------------------------------------------------------------------------------------------------------------------------------------------------------------------------------------------------------------------------------------------------------------------------------------------------------------------------------------------------------------------------------------------------------------------|
|    |     |        |        | NVQLFCSSSGHRELSRLVLTGGGSLPLGLAAQVGSELNCEVLHPDPFALFGKPKGE<br>GAVHGAKFMTALGLALRSFTPCQI                                                                                                                                                                                                                                                                                                                                                                                                                                                                                                                                                                                                                                                                                                                        |
| 12 | piN | K02663 | A0KN33 | MSNINLLPWREARAQRQKKQFGVMLGIFMAITASLGFAADWLVEQQIGHQQQR<br>NQRLQQEMTILDAQLGEIRLLKERRKELIDRMQLIEHLQMRRNLPVRLFNQLPSLV<br>PNGVYLNTLALQNNQIDVNGKTEAYGRVASMMRRIDGSGWLQSQISTIFAADV<br>APVSLSQFSMMFQVAGAAGATVDVAKGQQ                                                                                                                                                                                                                                                                                                                                                                                                                                                                                                                                                                                                 |
| 13 | piO | K02664 | A0KN32 | MNLQQLNELDLNNIASWPKLAKGIFLFFCALLGGAIYYVIANSLTLLTQETNKE<br>AELKAQFESKAMLAANLGAYKTQMVQLEQLVDTQLKQLPNTHEVAGLLDDISFI<br>ATDNGLKLNLRINWEPEIKHEFSTELPMRIEVVGTYHEIGKFTADMAALPRIVILESF<br>TLGQGKEQGDMIAMSLAKTYKYNGKTVGQTK                                                                                                                                                                                                                                                                                                                                                                                                                                                                                                                                                                                           |
| 14 | piP | K02665 | A0KN31 | MKLLCVLLPALLLTACGGQDDMDNYVAATKARKPVPIEPLPEIKPFSPMAYHLS<br>QRSPFIAPQPETSSAKVDAKVKPDCAQIVANREKEVLERYSLASLSMQGSLGKQGQ<br>LWALIRTPDGQSIRVGLNQHMGLDQGRVIRITDTYVDLIETIPDGKGCWVTRETQL<br>GMANLEAKR                                                                                                                                                                                                                                                                                                                                                                                                                                                                                                                                                                                                                 |
| 15 | piQ | K02666 | A0KN30 | MKTTIGMVARVTLLFCTGAWSQAWAVATLQEVKVNPLMADQLLLELSFSEPVSG<br>FTDRLSYEPNQLLLHVPGAVGALNVNPLPIKQQGVDNLKVEGKGAGLDIKIALDQ<br>LTPYQVHQGNKLLVALGEKAAMPLPATTASSGLVAPQPTSSALINTQPAASSALI<br>NSQQLARQSAPVAASVASKPVLPSPQTAASGAYFNSVKGVDFFRRGKDGQGEFLVT<br>LDNSSAADVSSRGQTVLAKFHGTRVPDDLNLINVQDFATPVSQVEVFRQGNDT<br>LFELSVNGQFDYRDQADKMFIVEVKKRTAATAGKQYQGKPISLNFQDIPVRTVL<br>QLIADFNNLNLVTTDSVSGNITLRLDGVPEQALDIILKVRGLDKRLDNNILLVAP<br>AEEIAAREKQQLESRNQVADLAPLYTEYLQINYAKASEVAALLSSESTKLLSSKGAV<br>SVDERTNVLVVKDTADVISNIKRMLDILDIPVKQVVIEARMVTIDDGFDEALGVRW<br>GVTKNDGHGNSTSGTIEGNDSSGNNNGGSTITRPGVDDRLNVNLPVTNAAGTLA<br>FQVARLADGTLLDLELSALEKESKAEIISPRVTTANQKPALIEQGTEIPYVESSSSG<br>ATSVTFKKAVLSLKVTPQITPDNRVILDLTVTQDTKGETVPTGTDAVSINAQSITT<br>QVLVNNGETLVLGGIYQQTIKSDVSKVPLLGDIPGLGVLFRTTSSENKKRELLIFVT<br>PKIVTDAF |
| 16 | piT | K02670 | A0KLU6 | MELRDMLQILAKQDGSPLYLSTGAPPCAKFNGLRPLSETPLEPGEVARIADA<br>IMDGEQKQQFERELEMNLAISLPQIGRFRINIFKQRNEVSLVARNIKTEIPRFEDL<br>KLPVLLDIMEKRGLVLFVGGTSGSKSTSLAALIDHRNRNSGGHIITIEDPVEFV<br>HRHRKSIINQREVGVDTRSFAALKNTLRQAPDVILIGEIRDRETMEHALAFSETG<br>HLAISTLHANNANQALDRIINFFPEERRPQLNDLGNLNLKAFVSQRLVKTS<br>DGGRRAAVEIMLGTHITIRDMIKRGEGGLKEVMEKSKALGMVTFDSALFDL<br>VVEGVVIDEEEEAVKNADSANNLRLKIKLWKEKGQIASSSDATGWSLEPTKDEK<br>DDL                                                                                                                                                                                                                                                                                                                                                                                        |

|    |     |        |        |                                                                                                                                                                                                                                                                                                                                                                                                                                                                                                                                                                                                                                                                                                                                                                                                                                                                                                                                                                                                                                                                                                                                                                                                                                          |
|----|-----|--------|--------|------------------------------------------------------------------------------------------------------------------------------------------------------------------------------------------------------------------------------------------------------------------------------------------------------------------------------------------------------------------------------------------------------------------------------------------------------------------------------------------------------------------------------------------------------------------------------------------------------------------------------------------------------------------------------------------------------------------------------------------------------------------------------------------------------------------------------------------------------------------------------------------------------------------------------------------------------------------------------------------------------------------------------------------------------------------------------------------------------------------------------------------------------------------------------------------------------------------------------------------|
| 17 | piV | K02671 | A0KG44 | MKRHQGVSLLEIMIAVLVLSIGILGMATLQLQALKSNQSALTRTEATQFGYMITDM<br>MRANRSAALLGQYNVGLGEAVSGSSMAIQDVQYWKQALTGLPGGDGAIAVSAG<br>QATITIQWNASRLATEPALRSMTLRTDL                                                                                                                                                                                                                                                                                                                                                                                                                                                                                                                                                                                                                                                                                                                                                                                                                                                                                                                                                                                                                                                                                        |
| 18 | piW | K02672 | A0KG45 | MSGRRTLLRQAGVGLVEVMIALLLSLLTVGVIIQVLLGNHKTYLTGEAIARVQEDS<br>RFAVNLLQQELRMVGYQGCLSKQGVNITNTLNGGTALPYNFTVYLRGYDNVTAT<br>LPTALSALFTAAPKPKPGTDVLLVQGPTGAGVPVTRNNSAAQLFVQQLSSKANY<br>CGTGKQGYSDLCEGDIVMVSDCQKARIFQITQTQVVGGSSEVNIGHSNDNKYTPG<br>NTVSSWGGASSPVEERFGAGSVLSRMETRIYYIARPSANAPYALYRKSGLAAGMLL<br>VDGVTDVQLTFGEDQNRDRAADRYVSAASNPNWDNVLGIGVQLLMRSGQGNV<br>VSDPQAISFAGATFQAVDNHWYVWAETTVALRNLRLP                                                                                                                                                                                                                                                                                                                                                                                                                                                                                                                                                                                                                                                                                                                                                                                                                                     |
| 19 | piX | K02673 | A0KG46 | MMARQGGMALVISLIFLAVVSLLAMASMQSALLQEKMAGNQKESQQALQAAEA<br>ALRAAERYLEAGSSGPYDNSAGLYEFVSVAVDPASPSTAWRTYANSGLSGRAPEYF<br>IERLPYTQGSNESLAVDEPISERRLYRITARGFGLSDES RVLLQSTYSR                                                                                                                                                                                                                                                                                                                                                                                                                                                                                                                                                                                                                                                                                                                                                                                                                                                                                                                                                                                                                                                                  |
| 20 | piY | K02674 | A0KG47 | MRASGYGLSALLLCTQVQAALDIAQVPLYLGTRAEPNIMFSLDDSGSMHFELMPE<br>GLIENSARYVYPRADNVYGSSEDYDNRTVTFTSNNDRNAYTRSSNNNKLYNPQQ<br>SYRPWAKADGTLMANASISCAPHNPFNTAAGCRDLTKNNRSKSLRYTGFSSTDY<br>NDDETFWPAVYFAYKSGSDVKKVGSYTRVEIKSGSTYGRPNRSDCKSAPVCTYD<br>EEIQNFANWYTYRSLAARAGVGRAFASQGQALRVGFATINASGSVIRGVAPFS<br>GTDRSAFFSDLYSRDIPAAGTPLRTSLKDVGEYFSRTDNNGPWAASAGSTLPHLTC<br>RQSYNILMTDGYWNGDTPSVGDLDKDGYSNTLADVAYKYWKTDLRADLADKVP<br>TSTADPANWQHLVNFTVGLGVNGSLNPANGIPNRWPNPHDPDDKEYKNATYIP<br>EYKIDDLWHAALNSKGSFFSAGDPDIFAAALSSTLAQIAARNSSASSVTANATRLD<br>SNTHIYQARYNSGDWSQLISIPLNSDGS LGNMAWDAATLIPAHTSR SIFTRQNGV<br>GIPFTWAALNATNRALFNLAGDSQGENRVAYLRGDRSREQSNGGLFRSRSDLLGD<br>IINSDPVYVGSRDYGYGSATGLTQAERDGYLSFLGSTAIRSRTPMLYVGANDGMLH<br>GFRVANGVETLAYIPVSLLDLSLLTKPDYSHRYVDGTAKVGDAYLGSSWKTVL<br>LGSTGAGGKAVFAIDVTAPDNFTADKMLWEFTNTEMGVALAAPT LVRVKSGNK<br>WVALVANGYNSTSQTARLFVLDLATGAVIKEIDTQVGSASEPNGLSSPLPVDEDG<br>DRVADYVYAGDLQGNLWKFDLTDNNSAQWGSFAFKTGKNPKPLFQACNGTCSA<br>STRQPVTMRPLAIRHPKGGIMVLMGTGSYFTNDDKLLPATPRLEAVYGIWDTGAS<br>VLSSQLLQQSITHEYSANGTTIKFNVRVVSNTGVNYTSQKGWYLVLKSPALSKGVG<br>ERAVSEMLYRNKRLIFNTLIPSADACDFGGRSWL<br>MELDPVSGARLTYSVFDVNGDGAVNDDDYVGKDSGGNDIKVPVSGKQFDELTT<br>TPSVVEDADMERKYISGSSGNISVTLEEGAGDLGGRQSWLQLE |

|    |      |    |         |                                                                                                                                             |
|----|------|----|---------|---------------------------------------------------------------------------------------------------------------------------------------------|
| 21 | pilZ | NA | AHA0877 | MGGGQHNCSCGPARRRQTEDVRVITSTKERRAFQRMIIINAPVTIFQQQQVLEGV<br>CRDLSANGMGIAVAEHQLDVSQPIRVSLATNNNLLPPFEAQARIIRVLEEEDGLLL<br>AIEFQALA             |
| 22 | pilZ | NA | AHA3680 | MSERRRFSRILYLTMA DLVQGDKKWRTQLVDISLQGALLIRPDDWESH DNKEYSL S<br>FVLSGSDIEIKMQVMLTHEASKKLG FYCHHIDIDSATHLKRMIELNVGDEDLLHRE<br>LEQLLSEHLEH PHP |



**Table S4:** Max score of Genome Blast for T4P components across *A. hydrophila* genomes

| Sl. No. | T4P Component | KO No. | Locus tag       | OnP3.1 | ATCC 7966 | ZYAH72 | WCX23 | 3019 | JBN2301 | 23-C-23 | Ah27 | D4   | LHW39 |
|---------|---------------|--------|-----------------|--------|-----------|--------|-------|------|---------|---------|------|------|-------|
| 1       | MshE          | K12276 | AHA_0392        | 2931   | 3158      | 2887   | 2959  | 2920 | 2898    | 2959    | 2898 | 2898 | 2898  |
| 2       | FimT          | K08084 | AHA_0686        | 898    | 931       | 881    | 898   | 898  | 881     | 898     | 881  | 881  | 881   |
| 3       | PilV          | K02671 | AHA_0687        | 688    | 765       | 704    | 699   | 699  | 704     | 699     | 477  | 477  | 477   |
| 4       | PilW          | K02672 | AHA_0688        | 1901   | 2023      | 1840   | 1868  | 1901 | 1840    | 1868    | 1840 | 1840 | 1840  |
| 5       | PilX          | K02673 | AHA_0689        | 826    | 881       | 848    | 854   | 852  | 848     | 854     | 848  | 848  | 848   |
| 6       | PilY          | K02674 | AHA_0690        | 5707   | 6194      | 5712   | 5674  | 5740 | 5712    | 5674    | 5712 | 5712 | 5712  |
| 7       | PilE          | K02655 | AHA_0691        | 688    | 743       | 693    | 710   | 676  | 693     | 710     | 693  | 693  | 693   |
| 8       | PilE          | K02655 | AHA_0692        | 604    | 715       | 643    | 693   | 610  | 643     | 693     | 643  | 643  | 643   |
| 9       | FimT          | K08084 | AHA_0693        | 865    | 992       | 881    | 953   | 920  | 881     | 953     | 881  | 881  | 881   |
| 10      | NA            | NA     | AHA_0694        | 953    | 1153      | 837    | 976   | 1014 | 837     | 976     | 837  | 837  | 837   |
| 11      | NA            | NA     | AHA_0695        | 688    | 743       | 693    | 710   | 676  | 693     | 710     | 693  | 693  | 693   |
| 12      | NA            | NA     | AHA_0696        | 3386   | 3878      | 3419   | 3441  | 3003 | 3419    | 3441    | 3419 | 3419 | 3419  |
| 13      | PilZ          | NA     | <u>AHA_0877</u> | 688    | 743       | 693    | 710   | 676  | 693     | 710     | 693  | 693  | 693   |
| 14      | PilF          | K02656 | <u>AHA_1757</u> | 688    | 743       | 693    | 710   | 676  | 693     | 710     | 693  | 693  | 693   |
| 15      | PilU          | K02670 | AHA_2739        | 1929   | 2106      | 1917   | 1945  | 1984 | 1917    | 1945    | 1917 | 1917 | 1917  |
| 16      | PilQ          | K02666 | <u>AHA_3190</u> | 688    | 743       | 693    | 710   | 676  | 693     | 710     | 693  | 693  | 693   |
| 17      | PilP          | K02665 | <u>AHA_3191</u> | 688    | 743       | 693    | 710   | 676  | 693     | 710     | 693  | 693  | 693   |
| 18      | PilO          | K02664 | <u>AHA_3192</u> | 688    | 743       | 693    | 710   | 676  | 693     | 710     | 693  | 693  | 693   |
| 19      | PilN          | K02663 | <u>AHA_3193</u> | 688    | 743       | 693    | 710   | 676  | 693     | 710     | 693  | 693  | 693   |
| 20      | PilM          | K02662 | <u>AHA_3194</u> | 688    | 743       | 693    | 710   | 676  | 693     | 710     | 693  | 693  | 693   |
| 21      | PilT          | K02669 | <u>AHA_3665</u> | 1929   | 2106      | 1917   | 1945  | 1984 | 1917    | 1945    | 1917 | 1917 | 1917  |
| 22      | PilU          | K02670 | AHA_3666        | 1924   | 2101      | 1912   | 1940  | 1979 | 1912    | 1940    | 1912 | 1912 | 1912  |
| 23      | PilZ          | NA     | <u>AHA_3680</u> | 688    | 743       | 693    | 710   | 676  | 693     | 710     | 693  | 693  | 693   |
| 24      | PilA          | K02650 | AHA_3868        | 132    | 893       | 171    | 159   | 169  | 171     | 159     | 171  | 171  | 172   |
| 25      | PilB          | K02652 | <u>AHA_3869</u> | 688    | 743       | 693    | 710   | 676  | 693     | 710     | 693  | 693  | 693   |
| 26      | PilC          | K02653 | AHA_3870        | 2061   | 2294      | 1995   | 2100  | 2100 | 1995    | 2100    | 1995 | 1995 | 1995  |
| 27      | PilD          | K02654 | AHA_3871        | 1463   | 1613      | 1408   | 1441  | 1447 | 1408    | 1441    | 1408 | 1408 | 1408  |

Table S4: (Contd.)

| Sl. No. | T4P Component | KO No. | Locus tag       | KAM330 | NUTM-VA1 | AC133 | Ah2111 | LP0103 | AC185 | GSH8-2 | WP8-S18-ESBL-02 | ZYAH75 | GYK1 |
|---------|---------------|--------|-----------------|--------|----------|-------|--------|--------|-------|--------|-----------------|--------|------|
| 1       | MshE          | K12276 | AHA_0392        | 2926   | 2959     | 2898  | 2998   | 2964   | 2904  | 2909   | 2909            | 2915   | 2898 |
| 2       | FimT          | K08084 | AHA_0686        | 887    | 881      | 881   | 0      | 887    | 0     | 909    | 909             | 876    | 881  |
| 3       | PilV          | K02671 | AHA_0687        | 688    | 682      | 704   | 0      | 665    | 0     | 682    | 682             | 682    | 704  |
| 4       | PilW          | K02672 | AHA_0688        | 1884   | 1823     | 1840  | 0      | 1862   | 0     | 1879   | 1879            | 1890   | 1840 |
| 5       | PilX          | K02673 | AHA_0689        | 832    | 848      | 848   | 0      | 848    | 0     | 843    | 843             | 815    | 848  |
| 6       | PilY          | K02674 | AHA_0690        | 5790   | 5696     | 5712  | 0      | 5768   | 0     | 5768   | 5768            | 5840   | 5712 |
| 7       | PilE          | K02655 | AHA_0691        | 710    | 699      | 693   | 0      | 660    | 0     | 660    | 660             | 688    | 693  |
| 8       | PilE          | K02655 | AHA_0692        | 688    | 643      | 643   | 0      | 693    | 0     | 693    | 693             | 627    | 643  |
| 9       | FimT          | K08084 | AHA_0693        | 953    | 959      | 881   | 0      | 931    | 0     | 931    | 931             | 887    | 881  |
| 10      | NA            | NA     | AHA_0694        | 942    | 959      | 837   | 0      | 1020   | 0     | 1020   | 1020            | 992    | 837  |
| 11      | NA            | NA     | AHA_0695        | 710    | 699      | 693   | 0      | 660    | 0     | 660    | 660             | 688    | 693  |
| 12      | NA            | NA     | AHA_0696        | 3496   | 3430     | 3419  | 0      | 3602   | 0     | 3602   | 3602            | 3413   | 3419 |
| 13      | PilZ          | NA     | <u>AHA_0877</u> | 710    | 699      | 693   | 693    | 660    | 693   | 660    | 660             | 688    | 693  |
| 14      | PilF          | K02656 | <u>AHA_1757</u> | 710    | 699      | 693   | 693    | 660    | 693   | 660    | 660             | 688    | 693  |
| 15      | PilU          | K02670 | AHA_2739        | 1967   | 1923     | 1917  | 1912   | 1962   | 1912  | 1940   | 1940            | 1956   | 1917 |
| 16      | PilQ          | K02666 | <u>AHA_3190</u> | 710    | 699      | 693   | 693    | 660    | 693   | 660    | 660             | 688    | 693  |
| 17      | PilP          | K02665 | <u>AHA_3191</u> | 710    | 699      | 693   | 693    | 660    | 693   | 660    | 660             | 688    | 693  |
| 18      | PilO          | K02664 | <u>AHA_3192</u> | 710    | 699      | 693   | 693    | 660    | 693   | 660    | 660             | 688    | 693  |
| 19      | PilN          | K02663 | <u>AHA_3193</u> | 710    | 699      | 693   | 693    | 660    | 693   | 660    | 660             | 688    | 693  |
| 20      | PilM          | K02662 | <u>AHA_3194</u> | 710    | 699      | 693   | 693    | 660    | 693   | 660    | 660             | 688    | 693  |
| 21      | PilT          | K02669 | <u>AHA_3665</u> | 1967   | 1923     | 1917  | 1912   | 1962   | 1912  | 1940   | 1940            | 1956   | 1917 |
| 22      | PilU          | K02670 | AHA_3666        | 1962   | 1918     | 1912  | 1907   | 1957   | 1907  | 1935   | 1935            | 1951   | 1912 |
| 23      | PilZ          | NA     | <u>AHA_3680</u> | 710    | 699      | 693   | 693    | 660    | 693   | 660    | 660             | 688    | 693  |
| 24      | PilA          | K02650 | AHA_3868        | 161    | 171      | 171   | 182    | 165    | 132   | 137    | 137             | 126    | 171  |
| 25      | PilB          | K02652 | <u>AHA_3869</u> | 710    | 699      | 693   | 693    | 660    | 693   | 660    | 660             | 688    | 693  |
| 26      | PilC          | K02653 | AHA_3870        | 2061   | 2078     | 1995  | 2073   | 2073   | 2084  | 2067   | 2067            | 2100   | 1995 |
| 27      | PilD          | K02654 | AHA_3871        | 1441   | 1480     | 1408  | 1430   | 1441   | 1530  | 1435   | 1435            | 1430   | 1408 |

Table S4: (Contd.)

| Sl. No. | T4P Component | KO No. | Locus tag       | HX-3 | WP7-S18-ESBL-06 | KN-Mc-1R2 | AH10 | AHNIH1 | AL06-06 | CSUSB2 | 4960 | Aer_Pi25.1HTAS | 71339 |
|---------|---------------|--------|-----------------|------|-----------------|-----------|------|--------|---------|--------|------|----------------|-------|
| 1       | MshE          | K12276 | AHA_0392        | 2920 | 2998            | 2937      | 2942 | 2953   | 2987    | 2915   | 2920 | 2920           | 2998  |
| 2       | FimT          | K08084 | AHA_0686        | 893  | 0               | 887       | 0    | 893    | 909     | 0      | 887  | 898            | 0     |
| 3       | PilV          | K02671 | AHA_0687        | 676  | 0               | 671       | 0    | 682    | 660     | 0      | 688  | 665            | 0     |
| 4       | PilW          | K02672 | AHA_0688        | 1851 | 0               | 1857      | 0    | 1857   | 1845    | 0      | 1834 | 1829           | 0     |
| 5       | PilX          | K02673 | AHA_0689        | 848  | 0               | 854       | 0    | 859    | 843     | 0      | 832  | 837            | 0     |
| 6       | PilY          | K02674 | AHA_0690        | 5690 | 0               | 5773      | 0    | 5729   | 5651    | 0      | 5738 | 5712           | 0     |
| 7       | PilE          | K02655 | AHA_0691        | 660  | 0               | 676       | 0    | 627    | 665     | 0      | 676  | 693            | 0     |
| 8       | PilE          | K02655 | AHA_0692        | 627  | 0               | 616       | 0    | 599    | 555     | 0      | 638  | 621            | 0     |
| 9       | FimT          | K08084 | AHA_0693        | 893  | 0               | 893       | 0    | 870    | 870     | 0      | 881  | 909            | 0     |
| 10      | NA            | NA     | AHA_0694        | 848  | 0               | 843       | 0    | 965    | 0       | 0      | 965  | 992            | 0     |
| 11      | NA            | NA     | AHA_0695        | 660  | 0               | 676       | 0    | 627    | 665     | 0      | 676  | 693            | 0     |
| 12      | NA            | NA     | AHA_0696        | 2047 | 0               | 3413      | 0    | 3059   | 0       | 0      | 3413 | 3419           | 0     |
| 13      | PilZ          | NA     | <u>AHA_0877</u> | 660  | 693             | 676       | 693  | 627    | 665     | 693    | 676  | 693            | 693   |
| 14      | PilF          | K02656 | <u>AHA_1757</u> | 660  | 693             | 676       | 693  | 627    | 665     | 693    | 676  | 693            | 693   |
| 15      | PilU          | K02670 | AHA_2739        | 1967 | 1967            | 1945      | 1945 | 1945   | 1906    | 1868   | 1951 | 2006           | 1929  |
| 16      | PilQ          | K02666 | <u>AHA_3190</u> | 660  | 693             | 676       | 693  | 627    | 665     | 693    | 676  | 693            | 693   |
| 17      | PilP          | K02665 | <u>AHA_3191</u> | 660  | 693             | 676       | 693  | 627    | 665     | 693    | 676  | 693            | 693   |
| 18      | PilO          | K02664 | <u>AHA_3192</u> | 660  | 693             | 676       | 693  | 627    | 665     | 693    | 676  | 693            | 693   |
| 19      | PilN          | K02663 | <u>AHA_3193</u> | 660  | 693             | 676       | 693  | 627    | 665     | 693    | 676  | 693            | 693   |
| 20      | PilM          | K02662 | <u>AHA_3194</u> | 660  | 693             | 676       | 693  | 627    | 665     | 693    | 676  | 693            | 693   |
| 21      | PilT          | K02669 | <u>AHA_3665</u> | 1967 | 1967            | 1945      | 1945 | 1945   | 1906    | 1868   | 1951 | 2006           | 1929  |
| 22      | PilU          | K02670 | <u>AHA_3666</u> | 1962 | 1962            | 1940      | 1940 | 1940   | 1901    | 1863   | 1946 | 2001           | 1924  |
| 23      | PilZ          | NA     | <u>AHA_3680</u> | 660  | 693             | 676       | 693  | 627    | 665     | 693    | 676  | 693            | 693   |
| 24      | PilA          | K02650 | AHA_3868        | 126  | 165             | 161       | 126  | 154    | 159     | 182    | 159  | 126            | 182   |
| 25      | PilB          | K02652 | <u>AHA_3869</u> | 660  | 693             | 676       | 693  | 627    | 665     | 693    | 676  | 693            | 693   |
| 26      | PilC          | K02653 | AHA_3870        | 2111 | 2073            | 2100      | 2078 | 2095   | 2134    | 2078   | 2084 | 2111           | 2073  |
| 27      | PilD          | K02654 | AHA_3871        | 1441 | 1435            | 1391      | 1386 | 1463   | 1419    | 1452   | 1435 | 1380           | 1435  |

Table S4: (Contd.)

| Sl. No. | T4P Component | KO No. | Locus tag       | A008N2 | MX16A | B11  | Brac6 | Aer_Brac14A | Aer_Brac66 | PartN-Ahydrophila-RM8376 | FDAARGOS_916 | 71317 | NEB724 |
|---------|---------------|--------|-----------------|--------|-------|------|-------|-------------|------------|--------------------------|--------------|-------|--------|
| 1       | MshE          | K12276 | AHA_0392        | 2998   | 2998  | 2898 | 2931  | 2931        | 2931       | 2920                     | 2920         | 2953  | 2200   |
| 2       | FimT          | K08084 | AHA_0686        | 898    | 0     | 682  | 898   | 898         | 898        | 887                      | 887          | 915   | 915    |
| 3       | PilV          | K02671 | AHA_0687        | 665    | 0     | 499  | 688   | 688         | 688        | 693                      | 693          | 665   | 665    |
| 4       | PilW          | K02672 | AHA_0688        | 1829   | 0     | 1519 | 1901  | 1901        | 1901       | 1906                     | 1906         | 1646  | 1646   |
| 5       | PilX          | K02673 | AHA_0689        | 837    | 0     | 693  | 826   | 826         | 826        | 859                      | 859          | 688   | 688    |
| 6       | PilY          | K02674 | AHA_0690        | 5712   | 0     | 4582 | 5707  | 5707        | 5707       | 5784                     | 5784         | 5657  | 5657   |
| 7       | PilE          | K02655 | AHA_0691        | 693    | 0     | 547  | 688   | 688         | 688        | 671                      | 671          | 699   | 699    |
| 8       | PilE          | K02655 | AHA_0692        | 621    | 0     | 414  | 604   | 604         | 604        | 604                      | 604          | 621   | 621    |
| 9       | FimT          | K08084 | AHA_0693        | 909    | 0     | 340  | 865   | 865         | 865        | 893                      | 893          | 909   | 909    |
| 10      | NA            | NA     | AHA_0694        | 992    | 0     | 0    | 953   | 953         | 953        | 976                      | 976          | 970   | 970    |
| 11      | NA            | NA     | AHA_0695        | 693    | 0     | 547  | 688   | 688         | 688        | 671                      | 671          | 699   | 699    |
| 12      | NA            | NA     | AHA_0696        | 0      | 0     | 652  | 3386  | 3386        | 3386       | 3109                     | 3109         | 3424  | 3424   |
| 13      | PilZ          | NA     | <u>AHA_0877</u> | 693    | 693   | 547  | 688   | 688         | 688        | 671                      | 671          | 699   | 693    |
| 14      | PilF          | K02656 | <u>AHA_1757</u> | 693    | 693   | 547  | 688   | 688         | 688        | 671                      | 671          | 699   | 693    |
| 15      | PilU          | K02670 | AHA_2739        | 1956   | 1956  | 1707 | 1929  | 1929        | 1929       | 1917                     | 1917         | 1956  | 1454   |
| 16      | PilQ          | K02666 | <u>AHA_3190</u> | 693    | 693   | 547  | 688   | 688         | 688        | 671                      | 671          | 699   | 693    |
| 17      | PilP          | K02665 | <u>AHA_3191</u> | 693    | 693   | 547  | 688   | 688         | 688        | 671                      | 671          | 699   | 693    |
| 18      | PilO          | K02664 | <u>AHA_3192</u> | 693    | 693   | 547  | 688   | 688         | 688        | 671                      | 671          | 699   | 693    |
| 19      | PilN          | K02663 | <u>AHA_3193</u> | 693    | 693   | 547  | 688   | 688         | 688        | 671                      | 671          | 699   | 693    |
| 20      | PilM          | K02662 | <u>AHA_3194</u> | 693    | 693   | 547  | 688   | 688         | 688        | 671                      | 671          | 699   | 693    |
| 21      | PilT          | K02669 | <u>AHA_3665</u> | 1956   | 1956  | 1707 | 1929  | 1929        | 1929       | 1917                     | 1917         | 1956  | 1454   |
| 22      | PilU          | K02670 | AHA_3666        | 1951   | 1951  | 1702 | 1924  | 1924        | 1924       | 1912                     | 1912         | 1951  | 1449   |
| 23      | PilZ          | NA     | <u>AHA_3680</u> | 693    | 693   | 547  | 688   | 688         | 688        | 671                      | 671          | 699   | 693    |
| 24      | PilA          | K02650 | AHA_3868        | 165    | 165   | 154  | 132   | 132         | 132        | 200                      | 200          | 159   | 0      |
| 25      | PilB          | K02652 | <u>AHA_3869</u> | 693    | 693   | 547  | 688   | 688         | 688        | 671                      | 671          | 699   | 693    |
| 26      | PilC          | K02653 | AHA_3870        | 2073   | 2073  | 1773 | 2061  | 2061        | 2061       | 2061                     | 2061         | 2001  | 1269   |
| 27      | PilD          | K02654 | AHA_3871        | 1435   | 1435  | 1369 | 1463  | 1463        | 1463       | 1402                     | 1402         | 1435  | 861    |

Table S4: (Contd.)

| Sl. No. | T4P Component | KO No. | Locus tag       | WCHAH<br>045096 | AL09-<br>71 | YL17 | NJ-<br>35 | ML09-<br>119 | pc104A | J-1  | 4AK4 | 2359 | 3206 | 3924 |
|---------|---------------|--------|-----------------|-----------------|-------------|------|-----------|--------------|--------|------|------|------|------|------|
| 1       | MshE          | K12276 | AHA_0392        | 2926            | 2898        | 0    | 2898      | 2898         | 2898   | 2898 | 2222 | 2933 | 2876 | 2909 |
| 2       | FimT          | K08084 | AHA_0686        | 887             | 881         | 688  | 881       | 881          | 881    | 881  | 0    | 904  | 876  | 893  |
| 3       | PilV          | K02671 | AHA_0687        | 676             | 704         | 510  | 704       | 704          | 704    | 704  | 0    | 671  | 680  | 665  |
| 4       | PilW          | K02672 | AHA_0688        | 1906            | 1840        | 0    | 1840      | 1840         | 1840   | 1840 | 0    | 1834 | 1832 | 1840 |
| 5       | PilX          | K02673 | AHA_0689        | 848             | 848         | 693  | 848       | 848          | 848    | 848  | 0    | 815  | 741  | 832  |
| 6       | PilY          | K02674 | AHA_0690        | 5734            | 5712        | 4626 | 5712      | 5712         | 5712   | 5712 | 0    | 5734 | 5629 | 5541 |
| 7       | PilE          | K02655 | AHA_0691        | 676             | 693         | 553  | 693       | 693          | 693    | 693  | 0    | 686  | 654  | 682  |
| 8       | PilE          | K02655 | AHA_0692        | 610             | 643         | 420  | 643       | 643          | 643    | 643  | 0    | 621  | 621  | 632  |
| 9       | FimT          | K08084 | AHA_0693        | 865             | 881         | 335  | 881       | 881          | 881    | 881  | 0    | 915  | 880  | 876  |
| 10      | NA            | NA     | AHA_0694        | 1020            | 837         | 0    | 837       | 837          | 837    | 837  | 0    | 976  | 968  | 865  |
| 11      | NA            | NA     | AHA_0695        | 676             | 693         | 553  | 693       | 693          | 693    | 693  | 0    | 686  | 654  | 682  |
| 12      | NA            | NA     | AHA_0696        | 3435            | 3419        | 0    | 3419      | 3419         | 3419   | 3419 | 0    | 3419 | 3051 | 3624 |
| 13      | PilZ          | NA     | <u>AHA_0877</u> | 676             | 693         | 553  | 693       | 693          | 693    | 693  | 693  | 686  | 654  | 682  |
| 14      | PilF          | K02656 | <u>AHA_1757</u> | 676             | 693         | 553  | 693       | 693          | 693    | 693  | 693  | 686  | 654  | 682  |
| 15      | PilU          | K02670 | AHA_2739        | 1973            | 1917        | 1768 | 1917      | 1917         | 1917   | 1917 | 1448 | 1989 | 1938 | 1851 |
| 16      | PilQ          | K02666 | <u>AHA_3190</u> | 676             | 693         | 553  | 693       | 693          | 693    | 693  | 693  | 686  | 654  | 682  |
| 17      | PilP          | K02665 | <u>AHA_3191</u> | 676             | 693         | 553  | 693       | 693          | 693    | 693  | 693  | 686  | 654  | 682  |
| 18      | PilO          | K02664 | <u>AHA_3192</u> | 676             | 693         | 553  | 693       | 693          | 693    | 693  | 693  | 686  | 654  | 682  |
| 19      | PilN          | K02663 | <u>AHA_3193</u> | 676             | 693         | 553  | 693       | 693          | 693    | 693  | 693  | 686  | 654  | 682  |
| 20      | PilM          | K02662 | <u>AHA_3194</u> | 676             | 693         | 553  | 693       | 693          | 693    | 693  | 693  | 686  | 654  | 682  |
| 21      | PilT          | K02669 | <u>AHA_3665</u> | 1973            | 1917        | 1768 | 1917      | 1917         | 1917   | 1917 | 1448 | 1989 | 1938 | 1851 |
| 22      | PilU          | K02670 | AHA_3666        | 1968            | 1912        | 1763 | 1912      | 1912         | 1912   | 1912 | 1443 | 1984 | 1933 | 1846 |
| 23      | PilZ          | NA     | <u>AHA_3680</u> | 676             | 693         | 553  | 693       | 693          | 693    | 693  | 693  | 686  | 654  | 682  |
| 24      | PilA          | K02650 | AHA_3868        | 148             | 171         | 154  | 171       | 171          | 171    | 171  | 0    | 159  | 159  | 128  |
| 25      | PilB          | K02652 | <u>AHA_3869</u> | 676             | 693         | 553  | 693       | 693          | 693    | 693  | 693  | 686  | 654  | 682  |
| 26      | PilC          | K02653 | AHA_3870        | 2061            | 1995        | 1790 | 1995      | 1995         | 1995   | 1995 | 1236 | 2049 | 2111 | 2117 |
| 27      | PilD          | K02654 | AHA_3871        | 1458            | 1408        | 1308 | 1408      | 1408         | 1408   | 1408 | 0    | 1434 | 1439 | 1419 |

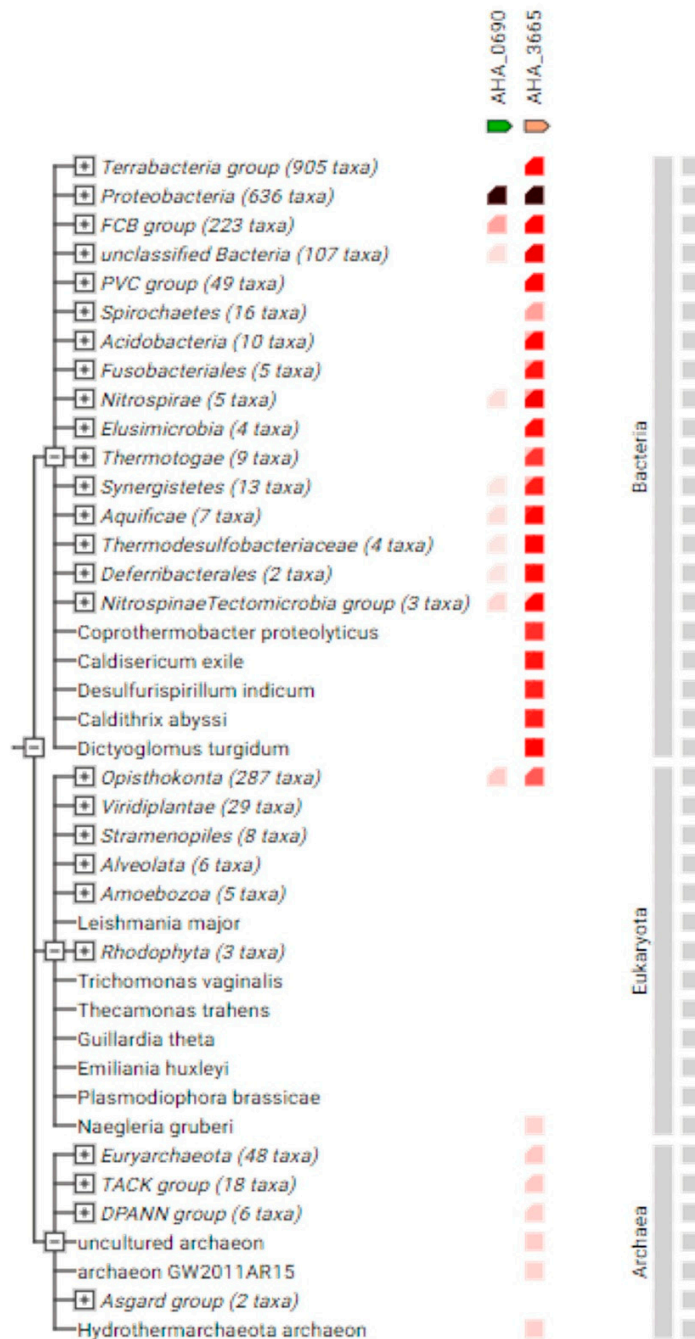

**Figure S1:** Cooccurrence of PilY and PilT across genomes indicating probable interaction between them.



## References

1. Averhoff, B.; Kirchner, L.; Pfefferle, K.; Yaman, D. Natural transformation in Gram-negative bacteria thriving in extreme environments: from genes and genomes to proteins, structures and regulation. *Extremophiles* **2021**, 1-12.
2. Potapova, A.; Carreira, L.A.M.; Sogaard-Andersen, L. The small GTPase MglA together with the TPR domain protein SgmX stimulates type IV pili formation in *M. xanthus*. *Proceedings of the National Academy of Sciences* **2020**, 117, 23859-23868.
3. Vahvelainen, N.; Bozkurt, E.; Maula, T.; Johansson, A.; Pöllänen, M.T.; Ihalin, R. Pilus PilA of the naturally competent HACEK group pathogen *Aggregatibacter actinomycetemcomitans* stimulates human leukocytes and interacts with both DNA and proinflammatory cytokines. *Microbial Pathogenesis* **2022**, 173, 105843.
4. Dye, K.J.; Vogelaar, N.J.; Sobrado, P.; Yang, Z. High-throughput screen for inhibitors of the type IV pilus assembly ATPase PilB. *Mosphere* **2021**, 6, 10.1128/msphere.00129-00121.
5. Rudel, T.; Scheuerpflug, I.; Meyer, T.F. Neisseria PilC protein identified as type-4 pilus tip-located adhesin. *Nature* **1995**, 373, 357-359.
6. Strom, M.S.; Nunn, D.N.; Lory, S. [42] Posttranslational processing of type IV prepilin and homologs by PilD of *Pseudomonas aeruginosa*. *Methods in enzymology* **1994**, 235, 527-540.
7. Darzins, A.; Russell, M.A. Molecular genetic analysis of type-4 pilus biogenesis and twitching motility using *Pseudomonas aeruginosa* as a model system—a review. *Gene* **1997**, 192, 109-115.
8. Koo, J.; Tammam, S.; Ku, S.-Y.; Sampaleanu, L.M.; Burrows, L.L.; Howell, P.L. PilF is an outer membrane lipoprotein required for multimerization and localization of the *Pseudomonas aeruginosa* type IV pilus secretin. *Journal of bacteriology* **2008**, 190, 6961-6969.
9. Liu, J.; Hu, L.; Xu, Z.; Tan, C.; Yuan, F.; Fu, S.; Cheng, H.; Chen, H.; Bei, W. *Actinobacillus pleuropneumoniae* two-component system QseB/QseC regulates the transcription of PilM, an important determinant of bacterial adherence and virulence. *Veterinary microbiology* **2015**, 177, 184-192.
10. McCallum, M.; Tammam, S.; Little, D.J.; Robinson, H.; Koo, J.; Shah, M.; Calmettes, C.; Moraes, T.F.; Burrows, L.L.; Howell, P.L. PilN binding modulates the structure and binding partners of the *Pseudomonas aeruginosa* type IVa pilus protein PilM. *Journal of biological Chemistry* **2016**, 291, 11003-11015.
11. Ozanic, M.; Marecic, V.; Knezevic, M.; Kelava, I.; Stojkova, P.; Lindgren, L.; Bröms, J.E.; Sjöstedt, A.; Abu Kwaik, Y.; Santic, M. The type IV pili component PilO is a virulence determinant of *Francisella novicida*. *Plos one* **2022**, 17, e0261938.
12. Balasingham, S.V.; Collins, R.F.; Assalkhou, R.; Homberset, H.v.; Frye, S.A.; Derrick, J.P.; Tønjum, T. Interactions between the lipoprotein PilP and the secretin PilQ in *Neisseria meningitidis*. *Journal of bacteriology* **2007**, 189, 5716-5727.
13. Narulita, E.; Addy, H.S.; Kawasaki, T.; Fujie, M.; Yamada, T. The involvement of the PilQ secretin of type IV pili in phage infection in *Ralstonia solanacearum*. *Biochemical and biophysical research communications* **2016**, 469, 868-872.
14. Hughes, H.Q.; Christman, N.D.; Dalia, T.N.; Ellison, C.K.; Dalia, A.B. The PilT retraction ATPase promotes both extension and retraction of the MSHA type IVa pilus in *Vibrio cholerae*. *PLoS Genetics* **2022**, 18, e1010561.



15. Winther-Larsen, H.C.; Hegge, F.T.; Wolfgang, M.; Hayes, S.F.; Van Putten, J.P.; Koomey, M. *Neisseria gonorrhoeae* PilV, a type IV pilus-associated protein essential to human epithelial cell adherence. *Proceedings of the National Academy of Sciences* **2001**, *98*, 15276-15281.
16. Carbonnelle, E.; Hélaine, S.; Prouvensier, L.; Nassif, X.; Pelicic, V. Type IV pilus biogenesis in *Neisseria meningitidis*: PilW is involved in a step occurring after pilus assembly, essential for fibre stability and function. *Molecular microbiology* **2005**, *55*, 54-64.
17. Helaine, S.; Dyer, D.H.; Nassif, X.; Pelicic, V.; Forest, K.T. 3D structure/function analysis of PilX reveals how minor pilins can modulate the virulence properties of type IV pili. *Proceedings of the National Academy of Sciences* **2007**, *104*, 15888-15893.
18. Heiniger, R.W.; Winther-Larsen, H.C.; Pickles, R.J.; Koomey, M.; Wolfgang, M.C. Infection of human mucosal tissue by *Pseudomonas aeruginosa* requires sequential and mutually dependent virulence factors and a novel pilus-associated adhesin. *Cellular microbiology* **2010**, *12*, 1158-1173.
19. Guzzo, C.R.; Salinas, R.K.; Andrade, M.O.; Farah, C.S. PILZ protein structure and interactions with PILB and the FIMX EAL domain: implications for control of type IV pilus biogenesis. *Journal of molecular biology* **2009**, *393*, 848-866.
